# Supplementary material for: Non-lethal exposure to H2O2 boosts bacterial survival and evolvability against oxidative stress
Source: PubMed Central journal article supplement (PMC7093028; doi:10.1371/journal.pgen.1008649), 2020-03-12

**A**

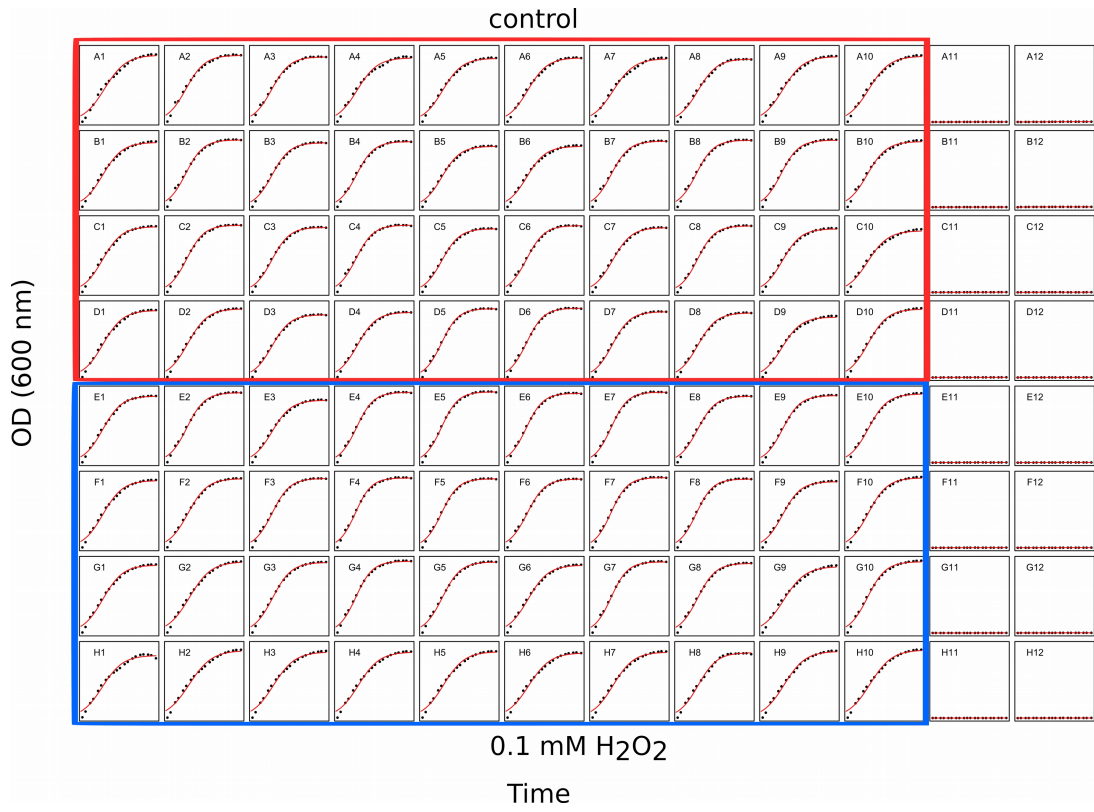

**B**

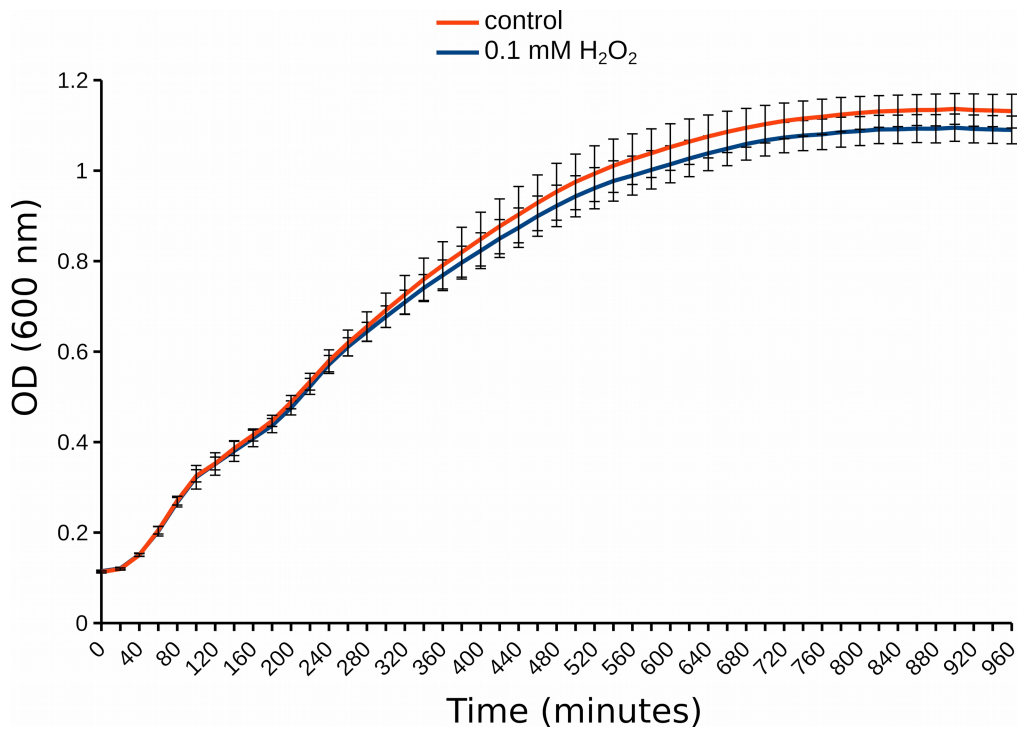

Supplement: pgen.1008649.s001.pdf [file pgen.1008649.s001.pdf]
