# Supplementary material for: Non-lethal exposure to H2O2 boosts bacterial survival and evolvability against oxidative stress
Source: PubMed Central journal article supplement (PMC7093028; doi:10.1371/journal.pgen.1008649), 2020-03-12
Supplement: pgen.1008649.s007.pdf [file pgen.1008649.s007.pdf]

Table S2. Quantitative H<sub>2</sub>O<sub>2</sub> determination of *E. coli* culture supernatants after a treatment with 1 mM after priming bacteria with 0.1 mM H<sub>2</sub>O<sub>2</sub> in comparison to naïve cells. H<sub>2</sub>O<sub>2</sub> concentrations were determined for 0, 15 and 30 minutes after the addition of H<sub>2</sub>O<sub>2</sub> using the Pierce Quantitative Peroxide kit (Thermo Scientific, Germany). The shown values represent the mean of the supernatant from three individual cultures and their standard deviations.

| Time (min) | Treatment [H <sub>2</sub> O <sub>2</sub> ] μM ( <i>mean</i> ± <i>sd</i> ) |                | Statistical inferences           |                 |
|------------|---------------------------------------------------------------------------|----------------|----------------------------------|-----------------|
|            | Naive                                                                     | Primed         | Fold-change ratio (naive/primed) | <i>p</i> -value |
| 0          | 1062.03±44.90                                                             | 1053.97± 69.58 | 0.99                             | 0.4380          |
| 15         | 723.68±62.43                                                              | 140.46±33.45   | 5.15                             | 0.00014         |
| 30         | 379.02±49.56                                                              | 22.37 ±23.06   | 16.94                            | 0.00035         |
