# Supplementary material for: Non-lethal exposure to H2O2 boosts bacterial survival and evolvability against oxidative stress
Source: PubMed Central journal article supplement (PMC7093028; doi:10.1371/journal.pgen.1008649), 2020-03-12
Supplement: pgen.1008649.s010.pdf [file pgen.1008649.s010.pdf]

Table S5. Stability predicted from the sequences of selected proteins that showed an elevated level of expression after treatment with H<sub>2</sub>O<sub>2</sub> 0.1 mM (priming concentration) and remained up or declined during memory duration of priming response.

| Protein | Estimated half-life | Stability index | Classification |
|---------|---------------------|-----------------|----------------|
| KatG    | >10 hours           | 27.00           | stable         |
| AhpC    | >10 hours           | 33.31           | stable         |
| AhpF    | >10 hours           | 28.11           | stable         |
| SufA    | >10 hours           | 40.85           | unstable       |
| OxyR    | >10 hours           | 42.21           | unstable       |
| GrxA    | >10 hours           | 25.29           | stable         |
| GhrA    | >10 hours           | 38.28           | stable         |
| YaaA    | >10 hours           | 32.05           | stable         |
| Dps     | >2 min              | 24.99           | unstable       |

#### Amino acid sequence evidence

##### KatG

MSTSDDIHNT TATGKCPFHQ GGHDQSAGAG TTRDWWPNQ LRVDLLNQHS  
NRSNPLGEDF  
DYRKEFSKLD YYGLKKDLKA LLTESQPWWP ADWGSYAGLF IRMAWHGAGT  
YRSIDGRGGA  
GRGQQRFAPL NSWPDNVSLD KARRLLWPIK QKYGQKISWA DLFILAGNVA  
LENSGFRTFG  
FGAGREDVWE PDLDVNWGDE KAWLTHRHPE ALAKAPLGAT EMGLIYVNPE  
GPDHSGEPLS  
AAAIRATFG NMGMNDEETV ALIAGGHTLG KTHGAGPTSN VGPDPEAAPI  
EEQGLGWAST  
YGSGVGADAI TSGLEVVTQ TPTQWSNYFF ENLFKYEWVQ TRSPAGAIQF  
EAVDAPEIIP  
DPFDPSKKRK PTMLVTDLTL RFDPEFEKIS RRFLNDPQAF NEAFARAWFK  
LTHRDMGPKS  
RYIGPEVPKE DLIWQDPLPQ PIYNPTEQDI IDLKFAIADS GLSVSELVSV AWASASTFRG  
GDKRGGANGA RLALMPQRDW DVNAAAVRAL PVLEKIQKES GKASLADIIV  
LAGVVGVEKA

ASAAGLSIHV PFAPGRVDAR QDQTDIEMFE LLEPIADGFR NYRARLDVST TESLLIDKAQ  
QLTLTAPEMT ALVGGMRVLG ANFDGSKNGV FTDRVGVLSN DFFVNLLDMR  
YEWKATDESK  
ELFEGRDRET GEVKFTASRA DLVFGSNSVL RAVAEVYASS DAHEKFKDF  
VAAWVKVMNL  
DRFDLL

Number of amino acids: 726

Molecular weight: 80023.82

Theoretical pI: 5.14

Amino acid composition:

Ala (A) 77 10.6%

Arg (R) 41 5.6%

Asn (N) 28 3.9%

Asp (D) 55 7.6%

Cys (C) 1 0.1%

Gln (Q) 24 3.3%

Glu (E) 44 6.1%

Gly (G) 65 9.0%

His (H) 13 1.8%

Ile (I) 28 3.9%

Leu (L) 63 8.7%

Lys (K) 35 4.8%

Met (M) 13 1.8%

Phe (F) 36 5.0%

Pro (P) 40 5.5%

Ser (S) 44 6.1%

Thr (T) 39 5.4%

Trp (W) 22 3.0%

Tyr (Y) 15 2.1%

Val (V) 43 5.9%

Pyl (O) 0 0.0%

Sec (U) 0 0.0%

(B) 0 0.0%

(Z) 0 0.0%

(X) 0 0.0%

Total number of negatively charged residues (Asp + Glu): 99

Total number of positively charged residues (Arg + Lys): 76

Estimated half-life:

The N-terminal of the sequence considered is M (Met).

The estimated half-life is: 30 hours (mammalian reticulocytes, in vitro).

>20 hours (yeast, in vivo).

>10 hours (Escherichia coli, in vivo).

Instability index:

The instability index (II) is computed to be 27.00

This classifies the protein as stable.

Aliphatic index: 76.67

Grand average of hydropathicity (GRAVY): -0.372

AhpC

```
MSLINTKIKP FKNQAFKNGE FIEITEKDTE GRWSVFFFYP ADFTFVCPT E LGDVADHYEE  
LQKLGVDVYA VSTDTHFTHK AWHSSSETIA KIKYAMIGDP TGALTRNFDN MREDEGLADR  
ATFVVDPPQGI IQAIEVTAEG IGRDASDLLR KIKAAQYVAS HPGEVCPAKW KEGEATLAPS  
LDLVGKI
```

Number of amino acids: 187

Molecular weight: 20761.44

Theoretical pI: 5.03

Amino acid composition:

Ala (A) 19 10.2%

Arg (R) 6 3.2%

Asn (N) 5 2.7%

Asp (D) 14 7.5%

Cys (C) 2 1.1%

Gln (Q) 5 2.7%

Glu (E) 15 8.0%

Gly (G) 13 7.0%

His (H) 5 2.7%

Ile (I) 13 7.0%

Leu (L) 11 5.9%

Lys (K) 14 7.5%

Met (M) 3 1.6%

Phe (F) 11 5.9%

Pro (P) 8 4.3%

Ser (S) 9 4.8%

Thr (T) 14 7.5%

Trp (W) 3 1.6%

Tyr (Y) 5 2.7%

Val (V) 12 6.4%

Pyl (O) 0 0.0%

Sec (U) 0 0.0%

Estimated half-life:

The N-terminal of the sequence considered is M (Met).

The estimated half-life is: 30 hours (mammalian reticulocytes, in vitro).

>20 hours (yeast, in vivo).

>10 hours (Escherichia coli, in vivo).

Instability index:

The instability index (II) is computed to be 33.31

This classifies the protein as stable.

Aliphatic index: 78.82

Grand average of hydropathicity (GRAVY): -0.278

AhpF

```
MLDTNMKTQL KAYLEKLTTP VELIATLDDS AKSAEIKELL AEIAELSDKV TFKEDNSLPV
RKPSFLITNP GSNQGPRFAG SPLGHEFTSL VLALLWTGGH PSKEAQSLE QIRHIDGDFE
FETYYSLSCH NCPDVVQALN LMSVLNPRIK HTAIDGGTFQ NEITDRNVMG VPAVFNNGKE
FGQGRMTLTE IVAKIDTGAE KRAAEELNKR DAYDVLIVGS GPAGAAAAIY SARKGIRTGL
MGERFGGQIL DTVDIENYIS VPKTEGQKLA GALKVHVDEY DVDVIDSQSA SKLIPAAVEG
GLHQIETASG AVLKARSIIV ATGAKWRNMN VPGEDQYRTK GVTYCPHCDG PLFKGKRVAV
IGGGNSGVEA AIDLAGIVEH VTLLEFAPEM KADQVLQDKL RSLKNVDIIL NAQTTEVKGD
GSKVVGLEYR DRVSGDIHNI ELAGIFVQIG LLPNTNWLEG AVERNRMGEI IIDAKCETNV
KGVFAAGDCT TVPYKQIIIA TGEGAKASLS AFDYLIRTKT A
```

Number of amino acids: 521

Molecular weight: 56177.11

Theoretical pI: 5.47

Amino acid composition:

Ala (A) 50 9.6%

|         |    |      |
|---------|----|------|
| Arg (R) | 21 | 4.0% |
| Asn (N) | 22 | 4.2% |
| Asp (D) | 31 | 6.0% |
| Cys (C) | 6  | 1.2% |
| Gln (Q) | 17 | 3.3% |
| Glu (E) | 37 | 7.1% |
| Gly (G) | 49 | 9.4% |
| His (H) | 10 | 1.9% |
| Ile (I) | 38 | 7.3% |
| Leu (L) | 47 | 9.0% |
| Lys (K) | 35 | 6.7% |
| Met (M) | 9  | 1.7% |
| Phe (F) | 15 | 2.9% |
| Pro (P) | 19 | 3.6% |
| Ser (S) | 27 | 5.2% |
| Thr (T) | 32 | 6.1% |
| Trp (W) | 3  | 0.6% |
| Tyr (Y) | 12 | 2.3% |
| Val (V) | 41 | 7.9% |



Pyl (O) 0 0.0%

Sec (U) 0 0.0%

(B) 0 0.0%

(Z) 0 0.0%

(X) 0 0.0%

Total number of negatively charged residues (Asp + Glu): 68

Total number of positively charged residues (Arg + Lys): 56

Ext. coefficient 34380

Abs 0.1% (=1 g/l) 0.612, assuming all Cys residues are reduced

Estimated half-life:

The N-terminal of the sequence considered is M (Met).

The estimated half-life is: 30 hours (mammalian reticulocytes, in vitro).

>20 hours (yeast, in vivo).

>10 hours (Escherichia coli, in vivo).

Instability index:

The instability index (II) is computed to be 28.11

This classifies the protein as stable.

Aliphatic index: 96.05

Grand average of hydropathicity (GRAVY): -0.123

SufA

MDMHSGETFNP QDFAWQGLTL TPAAAIHIRE LVAKQPGMVG VRLGVKQTGC AGFGYVLDSV  
SEPKDDDLLE EHDGAKLFVP LQAMPFIDGT EVDFVREGLN QIFKFHNPKA QNECGGESF GV

Number of amino acids: 122

Molecular weight: 13300.11

Theoretical pI: 4.85

Amino acid composition:

Ala (A) 9 7.4%

Arg (R) 3 2.5%

Asn (N) 4 3.3%

|         |    |       |
|---------|----|-------|
| Asp (D) | 9  | 7.4%  |
| Cys (C) | 3  | 2.5%  |
| Gln (Q) | 7  | 5.7%  |
| Glu (E) | 7  | 5.7%  |
| Gly (G) | 14 | 11.5% |
| His (H) | 4  | 3.3%  |
| Ile (I) | 4  | 3.3%  |
| Leu (L) | 10 | 8.2%  |
| Lys (K) | 6  | 4.9%  |
| Met (M) | 4  | 3.3%  |
| Phe (F) | 10 | 8.2%  |
| Pro (P) | 7  | 5.7%  |
| Ser (S) | 4  | 3.3%  |
| Thr (T) | 5  | 4.1%  |
| Trp (W) | 1  | 0.8%  |
| Tyr (Y) | 1  | 0.8%  |
| Val (V) | 10 | 8.2%  |
| Pyl (O) | 0  | 0.0%  |
| Sec (U) | 0  | 0.0%  |

(B) 0 0.0%

(Z) 0 0.0%

(X) 0 0.0%

Total number of negatively charged residues (Asp + Glu): 16

Total number of positively charged residues (Arg + Lys): 9

Ext. coefficient 6990

Abs 0.1% (=1 g/l) 0.526, assuming all Cys residues are reduced

Estimated half-life:

The N-terminal of the sequence considered is M (Met).

The estimated half-life is: 30 hours (mammalian reticulocytes, in vitro).

>20 hours (yeast, in vivo).

>10 hours (Escherichia coli, in vivo).

Instability index:

The instability index (II) is computed to be 40.85

This classifies the protein as unstable.

Aliphatic index: 75.90

Grand average of hydropathicity (GRAVY): -0.103

OxyR

```
MNIRDLEYLV ALAEHRHFRR AADSCHVSQP TLSGQIRKLE DELGVMLLER TSRKVLFTQA  
GMLLVDQART VLREVKVLKE MASQQGETMS GPLHIGLIPT VGPYLLPHII PMLHQTFPKL  
EMYLHEAQTH QLLAQLDSGK LDCVILALVK ESEAFIEVPL FDEPMLLAIY EDHPWANREC  
VPMADLAGEK LLMLLEDGHCL RDQAMGFCFE AGADEDTHFR ATSLETLRNM VAAGSGITLL  
PALAVPPERK RDGVVYLPCI KPEPRRTIGL VYRPGSPLRS RYEQLAEAIR ARMDGHFDKV  
LKQAV
```

Number of amino acids: 305

Molecular weight: 34275.93

Theoretical pI: 5.96

Amino acid composition:

Ala (A) 27 8.9%

Arg (R) 22 7.2%

Asn (N) 3 1.0%

Asp (D) 16 5.2%

Cys (C) 6 2.0%

Gln (Q) 13 4.3%

Glu (E) 25 8.2%

Gly (G) 18 5.9%

His (H) 12 3.9%

Ile (I) 13 4.3%

Leu (L) 44 14.4%

Lys (K) 12 3.9%

Met (M) 13 4.3%

Phe (F) 9 3.0%

Pro (P) 19 6.2%

Ser (S) 12 3.9%

Thr (T) 13 4.3%

Trp (W) 1 0.3%

Tyr (Y) 7 2.3%

Val (V) 20 6.6%

Pyl (O) 0 0.0%

Sec (U) 0 0.0%

(B) 0 0.0%

(Z) 0 0.0%

(X) 0 0.0%

Total number of negatively charged residues (Asp + Glu): 41

Total number of positively charged residues (Arg + Lys): 34

Estimated half-life:

The N-terminal of the sequence considered is M (Met).

The estimated half-life is: 30 hours (mammalian reticulocytes, in vitro).

>20 hours (yeast, in vivo).

>10 hours (Escherichia coli, in vivo).

Instability index:

The instability index (II) is computed to be 42.21

This classifies the protein as unstable.

Aliphatic index: 100.75

Grand average of hydropathicity (GRAVY): -0.088

GrxA

MQTVIFGRSG CPYCVRAKDL AEKLSNERDD FQYQYVDIRA EGITKEDLQQ  
KAGKPVETVP  
QIFVDQQHIG GYTDFAAWVK ENLDA

Number of amino acids: 85



**Molecular weight:** 9684.85

**Theoretical pI:** 4.81

**Amino acid composition:**

Ala (A) 7 8.2%

Arg (R) 4 4.7%

Asn (N) 2 2.4%

Asp (D) 8 9.4%

Cys (C) 2 2.4%

Gln (Q) 8 9.4%

Glu (E) 6 7.1%

Gly (G) 6 7.1%

His (H) 1 1.2%

Ile (I) 5 5.9%

Leu (L) 4 4.7%

Lys (K) 6 7.1%

Met (M) 1 1.2%

Phe (F) 4 4.7%

Pro (P) 3 3.5%

Ser (S) 2 2.4%

Thr (T) 4 4.7%

Trp (W) 1 1.2%

Tyr (Y) 4 4.7%

Val (V) 7 8.2%

Pyl (O) 0 0.0%

Sec (U) 0 0.0%

(B) 0 0.0%

(Z) 0 0.0%

(X) 0 0.0%

Total number of negatively charged residues (Asp + Glu): 14

Total number of positively charged residues (Arg + Lys): 10

Estimated half-life:

The N-terminal of the sequence considered is M (Met).

The estimated half-life is: 30 hours (mammalian reticulocytes, in vitro).

>20 hours (yeast, in vivo).

>10 hours (Escherichia coli, in vivo).

Instability index:

The instability index (II) is computed to be 25.29

This classifies the protein as stable.

Aliphatic index: 73.41

Grand average of hydropathicity (GRAVY): -0.571

GhrA

```
MDIIFYHPTF DTQWWIEALR KAIPQARVRA WKSGDNDSAD YALVWHPPVE MLAGRDLKAV
FALGAGVDSI LSKLQAHPEM LNPSVPLFRL EDTGMGEQMQ EYAVSQVLHW FRRFDDYRIQ
QNSSHWQPLP EYHREDFTIG ILGAGVLGSK VAQSLQWRF PLRCWSRTRK SWPGVQSFAG
REELSAFLSQ CRVLINLLPN TPETVGIINQ QLLEKLPDGA YLLNLARGVH VVEDDLAAL
DSGKVKGAML DVFNREPLPP ESPLWQHPRV TITPHVAAIT RPAAEAVEYIS RTIAQLEKGE
RVCGQVDRAR GY
```

Number of amino acids: 312

Molecular weight: 35343.42

Theoretical pI: 6.32

Amino acid composition:

Ala (A) 27 8.7%

Arg (R) 23 7.4%

Asn (N) 8 2.6%

Asp (D) 17 5.4%

Cys (C) 3 1.0%

Gln (Q) 18 5.8%

Glu (E) 19 6.1%

Gly (G) 20 6.4%

His (H) 9 2.9%

Ile (I) 15 4.8%

Leu (L) 34 10.9%

Lys (K) 10 3.2%

Met (M) 6 1.9%

Phe (F) 11 3.5%

Pro (P) 21 6.7%

Ser (S) 18 5.8%

Thr (T) 12 3.8%

Trp (W) 10 3.2%

Tyr (Y) 8 2.6%

Val (V) 23 7.4%

Pyl (O) 0 0.0%

Sec (U) 0 0.0%

(B) 0 0.0%

(Z) 0 0.0%

(X) 0 0.0%

Total number of negatively charged residues (Asp + Glu): 36

Total number of positively charged residues (Arg + Lys): 33

Estimated half-life:

The N-terminal of the sequence considered is M (Met).

The estimated half-life is: 30 hours (mammalian reticulocytes, in vitro).

>20 hours (yeast, in vivo).

>10 hours (Escherichia coli, in vivo).

Instability index:

The instability index (II) is computed to be 38.28

This classifies the protein as stable.

Aliphatic index: 91.28

Grand average of hydropathicity (GRAVY): -0.258

YaaA

```
MLILISPAKT LDYQSPLTTT RYTLPELLDN SQQLIHEARK LTPPQISTLM RISDKLAGIN  
AARFHDWQPD FTPANARQAI LAFKGDVYTG LQAETFSEDD FDFAAQQHLRM LSGLYGVLRP  
LDLMQPYRLE MGIRLENARG KDLYQFWGDI ITNKLNEALA AQQDNVVINL ASDEYFKSVK  
PKKLNAEIHK PVFLDEKNGK FKIIISFYAKK ARGLMSRFII ENRLTKPEQL TGFNSEGYFF  
DEDSSSNGEL VFKRYEQR
```

Number of amino acids: 258

Molecular weight: 29585.83

Theoretical pI: 6.86

Amino acid composition:

Ala (A) 19 7.4%

Arg (R) 15 5.8%

Asn (N) 13 5.0%

Asp (D) 17 6.6%

Cys (C) 0 0.0%

Gln (Q) 14 5.4%

Glu (E) 16 6.2%

Gly (G) 14 5.4%

His (H) 3 1.2%

Ile (I) 17 6.6%

Leu (L) 31 12.0%

Lys (K) 18 7.0%

Met (M) 6 2.3%

Phe (F) 16 6.2%

Pro (P) 12 4.7%

Ser (S) 15 5.8%

Thr (T) 13 5.0%

Trp (W) 2 0.8%

Tyr (Y) 10 3.9%

Val (V) 7 2.7%

Pyl (O) 0 0.0%

Sec (U) 0 0.0%

(B) 0 0.0%

(Z) 0 0.0%

(X) 0 0.0%

Total number of negatively charged residues (Asp + Glu): 33

Total number of positively charged residues (Arg + Lys): 33

Estimated half-life:

The N-terminal of the sequence considered is M (Met).

The estimated half-life is: 30 hours (mammalian reticulocytes, in vitro).



>20 hours (yeast, in vivo).

>10 hours (Escherichia coli, in vivo).

Instability index:

The instability index (II) is computed to be 32.05

This classifies the protein as stable.

Aliphatic index: 87.79

Grand average of hydropathicity (GRAVY): -0.403

Dps

MSTAKLVKSK ATNLLYTRND VSDSEKKATV ELLNRQVIQF IDLSLITKQA HWNMARGANFI  
AVHEMLDGFR TALIDHLDTM AERAVQLGGV ALGTTQVINS KTPLKSYPLD IHNVQDHLKE  
LADRYAIVAN DVRKAIGEAK DDDTADILTA ASRDLDKFLW FIESNIE

Number of amino acids: 166

Molecular weight: 18564.11

Theoretical pI: 5.70

Amino acid composition:

|         |    |       |
|---------|----|-------|
| Ala (A) | 18 | 10.8% |
| Arg (R) | 8  | 4.8%  |
| Asn (N) | 9  | 5.4%  |
| Asp (D) | 16 | 9.6%  |
| Cys (C) | 0  | 0.0%  |
| Gln (Q) | 6  | 3.6%  |

|         |    |       |
|---------|----|-------|
| Glu (E) | 8  | 4.8%  |
| Gly (G) | 6  | 3.6%  |
| His (H) | 5  | 3.0%  |
| Ile (I) | 12 | 7.2%  |
| Leu (L) | 19 | 11.4% |
| Lys (K) | 12 | 7.2%  |
| Met (M) | 3  | 1.8%  |
| Phe (F) | 5  | 3.0%  |
| Pro (P) | 2  | 1.2%  |
| Ser (S) | 9  | 5.4%  |
| Thr (T) | 12 | 7.2%  |
| Trp (W) | 2  | 1.2%  |
| Tyr (Y) | 3  | 1.8%  |
| Val (V) | 11 | 6.6%  |
| Pyl (O) | 0  | 0.0%  |
| Sec (U) | 0  | 0.0%  |

|     |   |      |
|-----|---|------|
| (B) | 0 | 0.0% |
| (Z) | 0 | 0.0% |
| (X) | 0 | 0.0% |

Total number of negatively charged residues (Asp + Glu): 24

Total number of positively charged residues (Arg + Lys): 20

Atomic composition:

|          |   |      |
|----------|---|------|
| Carbon   | C | 821  |
| Hydrogen | H | 1325 |
| Nitrogen | N | 229  |
| Oxygen   | O | 254  |
| Sulfur   | S | 3    |

Formula: C<sub>821</sub>H<sub>1325</sub>N<sub>229</sub>O<sub>254</sub>S<sub>3</sub>

Total number of atoms: 2632

Extinction coefficients:

Extinction coefficients are in units of M<sup>-1</sup> cm<sup>-1</sup>, at 280 nm measured in water.

Ext. coefficient 15470

Abs 0.1% (=1 g/l) 0.833

Estimated half-life:

The N-terminal of the sequence considered is S (Ser).

The estimated half-life is: 1.9 hours (mammalian reticulocytes, in vitro).  
>20 hours (yeast, in vivo).  
>10 hours (Escherichia coli, in vivo).

Instability index:

The instability index (II) is computed to be 43.57

This classifies the protein as unstable.

Aliphatic index: 102.89

Grand average of hydropathicity (GRAVY): -0.227
