# Supplementary material for: Non-lethal exposure to H2O2 boosts bacterial survival and evolvability against oxidative stress
Source: PubMed Central journal article supplement (PMC7093028; doi:10.1371/journal.pgen.1008649), 2020-03-12
Supplement: pgen.1008649.s011.pdf [file pgen.1008649.s011.pdf]

Table S6. Transcripts differentially expressed ( $\pm 2 \log_2$ ) in the fraction of small of RNA <200 nt) during the decay of hydrogen peroxide response.

| Gene | Log2 fold change | P-value  | Description                                                            |
|------|------------------|----------|------------------------------------------------------------------------|
| oxyS | 3.73             | 8.24E-15 | OxyS sRNA regulates genes in response to H <sub>2</sub> O <sub>2</sub> |
| rbsA | 3.12             | 2.83E-09 | Ribose import ATP-binding protein RbsA                                 |
| rplW | 3.10             | 8.37E-08 | 50S ribosomal protein L23                                              |
| cyoB | 2.76             | 1.23E-06 | Cytochrome bo(3) ubiquinol oxidase subunit 1                           |
| rplB | 2.45             | 4.73E-16 | 50S ribosomal protein L2                                               |
| rpsJ | 2.42             | 3.43E-10 | 30S ribosomal protein S10                                              |
| rplC | 2.24             | 5.83E-14 | 50S ribosomal protein L3                                               |
| fruB | 2.20             | 3.59E-04 | Multiphosphoryl transfer protein                                       |
| leuZ | 2.11             | 1.15E-08 | Leucine tRNA(GAG) 4                                                    |
| ptsG | 2.10             | 3.73E-10 | PTS system glucose-specific EIICB component                            |
| rpsC | 2.08             | 4.01E-07 | 30S ribosomal protein S3                                               |
| rplX | 2.06             | 1.30E-05 | 50S ribosomal protein L24                                              |
| rpsE | 2.03             | 2.05E-08 | 30S ribosomal protein S5                                               |
| raiA | -2.01            | 5.78E-12 | Ribosome-associated inhibitor A                                        |
| dcuA | -2.05            | 1.51E-03 | Anaerobic C <sub>4</sub> -dicarboxylate transporter DcuA               |
| deoA | -2.11            | 1.43E-04 | Thymidine phosphorylase                                                |
| adhE | -2.20            | 1.15E-06 | Aldehyde-alcohol dehydrogenase                                         |
| gatD | -2.22            | 1.41E-03 | Galactitol-1-phosphate 5-dehydrogenase                                 |
| dnaK | -2.56            | 7.42E-05 | Chaperone protein DnaK                                                 |
| yhjX | -2.60            | 1.19E-04 | Uncharacterized MFS-type transporter YhjX                              |
| glnA | -2.62            | 1.12E-04 | Glutamine synthetase                                                   |
| treB | -2.66            | 5.70E-07 | PTS system trehalose-specific EIIBC component                          |
| glpT | -2.67            | 1.24E-06 | Glycerol-3-phosphate transporter                                       |
| clpA | -2.76            | 1.36E-05 | ATP-dependent Clp protease ATP-binding subunit ClpA                    |
| glpA | -2.78            | 6.94E-05 | Anaerobic glycerol-3-phosphate dehydrogenase subunit A                 |
| nanA | -2.80            | 6.12E-05 | N-acetylneuraminate lyase                                              |
| gatC | -2.88            | 2.15E-09 | NA                                                                     |
| glpQ | -2.98            | 6.54E-09 | Glycerophosphoryl diester phosphodiesterase                            |
| glpK | -2.99            | 1.79E-08 | Glycerol kinase                                                        |
| glpB | -3.02            | 1.28E-05 | Anaerobic glycerol-3-phosphate dehydrogenase subunit B                 |
| glpD | -3.06            | 6.99E-09 | Aerobic glycerol-3-phosphate dehydrogenase                             |
| dtpB | -3.08            | 2.06E-06 | Dipeptide and tripeptide permease B                                    |
| rbbA | -3.26            | 1.73E-06 | Ribosome-associated ATPase                                             |
| malM | -3.61            | 5.57E-08 | Maltose operon periplasmic protein                                     |
| tnaA | -3.78            | 9.07E-11 | Tryptophanase                                                          |
| yjiY | -4.20            | 4.75E-15 | Inner membrane protein YjiY                                            |
