# Supplementary material for: Non-lethal exposure to H2O2 boosts bacterial survival and evolvability against oxidative stress
Source: PubMed Central journal article supplement (PMC7093028; doi:10.1371/journal.pgen.1008649), 2020-03-12
Supplement: pgen.1008649.s012.pdf [file pgen.1008649.s012.pdf]

Table S7. Transcripts differentially expressed ( $\pm 2.5 \log_2$ ) in the fraction of large RNA (>200 nt) during the decay of hydrogen peroxide response.

| Gene | Log2 fold change | P-value   | Description                                                        |
|------|------------------|-----------|--------------------------------------------------------------------|
| oxyS | 4.02             | 2.34E-10  | OxyS sRNA regulates genes in response to H2O2                      |
| ptsG | 3.92             | 4.87E-96  | PTS system glucose-specific EIICB component                        |
| rbsA | 3.90             | 3.78E-73  | Ribose import ATP-binding protein RbsA                             |
| fruB | 3.66             | 2.13E-105 | Multiphosphoryl transfer protein                                   |
| rplV | 3.48             | 7.18E-139 | 50S ribosomal protein L22                                          |
| rpsQ | 3.47             | 5.52E-110 | 30S ribosomal protein S17                                          |
| yihL | 3.42             | 2.45E-10  | Uncharacterized HTH-type transcriptional regulator YihL            |
| rpsC | 3.26             | 4.84E-164 | 30S ribosomal protein S3                                           |
| rpsS | 3.22             | 1.96E-154 | 30S ribosomal protein S19                                          |
| rplP | 3.21             | 9.71E-115 | 50S ribosomal protein L16                                          |
| rplW | 3.13             | 5.30E-173 | 50S ribosomal protein L23                                          |
| rpmC | 3.10             | 3.41E-40  | 50S ribosomal protein L29                                          |
| cyoD | 3.05             | 6.09E-19  | Cytochrome bo(3) ubiquinol oxidase subunit 4                       |
| rplB | 2.99             | 2.76E-161 | 50S ribosomal protein L2                                           |
| cyoC | 2.98             | 3.55E-32  | Cytochrome bo(3) ubiquinol oxidase subunit 3                       |
| rpsA | 2.74             | 1.13E-167 | 30S ribosomal protein S1                                           |
| rplO | 2.71             | 1.56E-73  | 50S ribosomal protein L15                                          |
| rplQ | 2.71             | 4.27E-113 | 50S ribosomal protein L17                                          |
| rplD | 2.69             | 1.14E-102 | 50S ribosomal protein L4                                           |
| sdaB | 2.66             | 4.27E-29  | L-serine dehydratase 2                                             |
| fecB | 2.62             | 2.78E-06  | Fe(3+) dicitrate-binding periplasmic protein                       |
| fruK | 2.62             | 1.21E-36  | 1-phosphofructokinase                                              |
| rpmD | 2.61             | 1.67E-33  | 50S ribosomal protein L30                                          |
| cyoB | 2.60             | 2.70E-42  | Cytochrome bo(3) ubiquinol oxidase subunit 1                       |
| rbsD | 2.59             | 2.25E-95  | D-ribose pyranase                                                  |
| secY | 2.53             | 1.04E-157 | Protein translocase subunit SecY                                   |
| rpsE | 2.52             | 9.45E-50  | 30S ribosomal protein S5                                           |
| rplC | 2.51             | 6.52E-149 | 50S ribosomal protein L3                                           |
| yicG | -2.53            | 3.42E-10  | UPF0126 inner membrane protein YicG                                |
| glgX | -2.55            | 1.50E-15  | Glycogen debranching enzyme                                        |
| yhaM | -2.55            | 2.25E-07  | NA                                                                 |
| treA | -2.56            | 4.75E-07  | Periplasmic trehalase                                              |
| htpG | -2.56            | 2.54E-32  | Chaperone protein HtpG                                             |
| frdB | -2.58            | 4.04E-04  | Fumarate reductase iron-sulfur subunit                             |
| ftnB | -2.59            | 3.02E-05  | Bacterial non-heme ferritin-like protein                           |
| aceA | -2.60            | 1.93E-13  | Isocitrate lyase                                                   |
| srlE | -2.61            | 1.06E-07  | Glucitol/sorbitol-specific phosphotransferase enzyme IIB component |
| glnA | -2.61            | 3.74E-60  | Glutamine synthetase                                               |
| ygfF | -2.65            | 2.67E-04  | Uncharacterized oxidoreductase YgfF                                |
| nanE | -2.67            | 1.78E-05  | Putative N-acetylmannosamine-6-phosphate 2-epimerase               |
| malM | -2.68            | 6.31E-15  | Maltose operon periplasmic protein                                 |
| flgG | -2.71            | 6.60E-04  | Flagellar basal-body rod protein FlgG                              |
| glpD | -2.74            | 8.49E-13  | Aerobic glycerol-3-phosphate dehydrogenase                         |
| tnaC | -2.75            | 2.86E-25  | Tryptophanase leader peptide                                       |
| yhhJ | -2.75            | 1.31E-08  | Inner membrane transport permease YhhJ                             |
| glnQ | -2.75            | 1.71E-09  | Glutamine transport ATP-binding protein GlnQ                       |
| rbbA | -2.76            | 3.25E-10  | Ribosome-associated ATPase                                         |
| glnL | -2.78            | 2.37E-09  | Nitrogen regulation protein NR(II)                                 |
| tdcE | -2.78            | 7.91E-09  | PFL-like enzyme TdcE                                               |

| Gene | Log2 fold change | P-value  | Description                                                        |
|------|------------------|----------|--------------------------------------------------------------------|
| glnH | -2.80            | 4.66E-40 | Glutamine-binding periplasmic protein                              |
| nanT | -2.82            | 6.98E-08 | Putative sialic acid transporter                                   |
| dppF | -2.86            | 1.36E-05 | Dipeptide transport ATP-binding protein DppF                       |
| gatD | -2.88            | 2.42E-05 | Galactitol-1-phosphate 5-dehydrogenase                             |
| malG | -2.91            | 1.58E-06 | Maltose transport system permease protein MalG                     |
| srlD | -3.00            | 2.31E-16 | Sorbitol-6-phosphate 2-dehydrogenase                               |
| preT | -3.01            | 2.93E-13 | NAD-dependent dihydropyrimidine dehydrogenase subunit PreT         |
| glnP | -3.02            | 1.34E-11 | Glutamine transport system permease protein GlnP                   |
| hybA | -3.06            | 5.68E-08 | Hydrogenase-2 operon protein HybA                                  |
| dppD | -3.08            | 6.15E-05 | Dipeptide transport ATP-binding protein DppD                       |
| glgA | -3.09            | 2.36E-18 | Glycogen synthase                                                  |
| preA | -3.11            | 9.50E-18 | NAD-dependent dihydropyrimidine dehydrogenase subunit PreA         |
| nanA | -3.18            | 7.54E-53 | N-acetylneuraminase lyase                                          |
| glgP | -3.25            | 8.54E-28 | Glycogen phosphorylase                                             |
| nrdD | -3.27            | 3.28E-07 | Anaerobic ribonucleoside-triphosphate reductase                    |
| glgC | -3.32            | 5.62E-28 | Glucose-1-phosphate adenylyltransferase                            |
| nanK | -3.47            | 4.04E-10 | N-acetylmannosamine kinase                                         |
| glpK | -3.47            | 7.37E-98 | Glycerol kinase                                                    |
| srlB | -3.53            | 1.96E-05 | Glucitol/sorbitol-specific phosphotransferase enzyme IIA component |
| lldD | -3.60            | 1.00E-09 | L-lactate dehydrogenase                                            |
| yhcH | -3.85            | 2.78E-10 | Uncharacterized protein YhcH                                       |
| yjiY | -3.87            | 2.85E-24 | Inner membrane protein YjiY                                        |
| dsdX | -3.88            | 1.18E-11 | DsdX permease                                                      |
| clpB | -3.91            | 9.50E-71 | Chaperone protein ClpB                                             |
| glpQ | -4.05            | 1.21E-59 | Glycerophosphoryl diester phosphodiesterase                        |
| yhjX | -4.09            | 3.34E-44 | Uncharacterized MFS-type transporter YhjX                          |
| tdcD | -4.44            | 7.60E-07 | Propionate kinase                                                  |
| cadB | -4.67            | 1.67E-09 | Probable cadaverine/lysine antiporter                              |
| tnaA | -4.80            | 8.72E-29 | Tryptophanase                                                      |
| glpB | -4.94            | 9.23E-20 | Anaerobic glycerol-3-phosphate dehydrogenase subunit B             |
| tnaB | -4.99            | 3.17E-13 | Low affinity tryptophan permease                                   |
| dsdA | -5.06            | 3.05E-36 | D-serine dehydratase                                               |
| cadA | -5.34            | 8.06E-13 | Lysine decarboxylase. inducible                                    |
| glpC | -5.97            | 1.59E-16 | Anaerobic glycerol-3-phosphate dehydrogenase subunit C             |
