# Supplementary material for: Non-lethal exposure to H2O2 boosts bacterial survival and evolvability against oxidative stress
Source: PubMed Central journal article supplement (PMC7093028; doi:10.1371/journal.pgen.1008649), 2020-03-12
Supplement: pgen.1008649.s013.pdf [file pgen.1008649.s013.pdf]

| <b>Gene</b>        | <b>Gene function</b>                                                                                                                               | <b>Type</b> | <b>Result</b> | <b>Expression</b> | <b>Std. Error</b> | <b>95% C.I.</b> | <b>P(H1)</b> |
|--------------------|----------------------------------------------------------------------------------------------------------------------------------------------------|-------------|---------------|-------------------|-------------------|-----------------|--------------|
| <b><i>asnA</i></b> | Asparagine synthase A                                                                                                                              | REF         |               | 2.3               |                   |                 |              |
| <b><i>metL</i></b> | Bifunctional aspartokinase/homoserine dehydrogenase 2                                                                                              | REF         |               | -2.3              |                   |                 |              |
| <b><i>mntH</i></b> | Mn transport                                                                                                                                       | TRG         | UP            | 55.5              | 51.567 - 59.843   | 49.843 - 61.254 | 0.000        |
| <b><i>sufA</i></b> | Scaffold protein for assembly of iron-sulfur clusters; facilitates delivery to target proteins; Fe-S transfer protein                              | TRG         | UP            | 18.2              | 14.303 - 21.615   | 13.185 - 25.838 | 0.000        |
| <b><i>fur</i></b>  | Ferric uptake regulation                                                                                                                           | TRG         | NDE           | -1.1              | 0.845 - 0.942     | 0.832 - 0.959   | 0.090        |
| <b><i>ahpC</i></b> | Alkyl hydroperoxide reductase, subunit C; reduced by the AhpF subunit. protects aerobic, phosphate-starved cells from oxidative damage             | TRG         | UP            | 7.3               | 6.616 - 8.502     | 6.507 - 8.808   | 0.000        |
| <b><i>yaaA</i></b> | Peroxide resistance protein, lowers intracellular iron                                                                                             | TRG         | UP            | 2.2               | 1.954 - 2.526     | 1.862 - 2.610   | 0.000        |
| <b><i>oxyR</i></b> | Oxidative and nitrosative stress transcriptional regulator                                                                                         | TRG         | NDE           | -4.9              | 0.185 - 0.222     | 0.179 - 0.238   | 0.079        |
| <b><i>katG</i></b> | Catalase-peroxidase HPI, heme b-containing; hydroperoxidase I. KatG protects aerobic, phosphate-starved cells from oxidative damage                | TRG         | UP            | 25.7              | 19.066 - 33.678   | 17.159 - 42.580 | 0.011        |
| <b><i>ahpF</i></b> | Alkyl hydroperoxide reductase, subunit F; NAD(P)H:peroxiredoxin oxidoreductase, reduces AhpC; contains one FAD/monomer                             | TRG         | UP            | 5.6               | 4.739 - 6.291     | 4.489 - 7.307   | 0.011        |
| <b><i>dps</i></b>  | Stress-induced Fe-binding and storage protein; forms biocrystals with DNA; copper homeostatsis. Dps confers starvation-induced resistance to H2O2. | TRG         | UP            | 3.1               | 2.676 - 3.484     | 2.530 - 3.915   | 0.021        |
