# Supplementary material for: Non-lethal exposure to H2O2 boosts bacterial survival and evolvability against oxidative stress
Source: PubMed Central journal article supplement (PMC7093028; doi:10.1371/journal.pgen.1008649), 2020-03-12
Supplement: pgen.1008649.s014.pdf [file pgen.1008649.s014.pdf]

Table S9. Strains and plasmids used in this work and their relevant phenotypes

| Strain                                             | Relevant phenotype                                         | Reference |
|----------------------------------------------------|------------------------------------------------------------|-----------|
| <i>E. coli</i> MG1655 WT                           | F <sup>-</sup> λ <sup>-</sup>                              | Lab stock |
| <i>E. coli</i> MG1655 <i>oxyR::scar</i>            | F <sup>-</sup> λ <sup>-</sup> <i>oxyR::scar</i>            | this work |
| <i>E. coli</i> MG1655 <i>katG::scar</i>            | F <sup>-</sup> λ <sup>-</sup> <i>katG::scar</i>            | this work |
| <i>E. coli</i> MG1655 <i>ahpF::scar</i>            | F <sup>-</sup> λ <sup>-</sup> <i>ahpF::scar</i>            | this work |
| <i>E. coli</i> MG1655 <i>ahpF::scar katG::scar</i> | F <sup>-</sup> λ <sup>-</sup> <i>ahpF::scar katG::scar</i> | this work |
| <i>E. coli</i> MG1655 <i>grxA::scar</i>            | F <sup>-</sup> λ <sup>-</sup> <i>grxA::scar</i>            | this work |
| <i>E. coli</i> MG1655 <i>ghrA::scar</i>            | F <sup>-</sup> λ <sup>-</sup> <i>ghrA::scar</i>            | this work |
| <i>E. coli</i> MG1655 <i>lipA::scar</i>            | F <sup>-</sup> λ <sup>-</sup> <i>lipA::scar</i>            | this work |
| <i>E. coli</i> MG1655 <i>rdgB::scar</i>            | F <sup>-</sup> λ <sup>-</sup> <i>rdgB::scar</i>            | this work |
| <i>E. coli</i> MG1655 <i>yaaA::scar</i>            | F <sup>-</sup> λ <sup>-</sup> <i>yaaA::scar</i>            | this work |
| <i>E. coli</i> MG1655 <i>recA::scar</i>            | F <sup>-</sup> λ <sup>-</sup> <i>recA::scar</i>            | this work |
| <i>E. coli</i> MG1655 <i>fimE</i> (Δ1 bp, 248 nt)  | <i>fimE</i> Δ1 bp, position 248                            | this work |
| <i>E. coli</i> MG1655 <i>insB1→flhD</i> Δ1 bp      | Δ1 bp, position 1978504                                    | this work |
| <i>E. coli</i> MG1655 <i>insB1→flhD</i> Δ10 bp     | Δ10 bp, position 1978493                                   | this work |
| <i>E. coli</i> MG1655 <i>oxyS::Cm</i>              | F <sup>-</sup> λ <sup>-</sup> <i>oxyS::Cm</i>              | 27        |
| <i>E. coli</i> BW25113 <i>oxyR::Kan</i>            | <i>oxyR::Kan</i>                                           | 57        |
| <i>E. coli</i> BW25113 <i>katG::Kan</i>            | <i>katG::Kan</i>                                           | 57        |
| <i>E. coli</i> BW25113 <i>ahpF::Kan</i>            | <i>ahpF::Kan</i>                                           | 57        |
| <i>E. coli</i> BW25113 <i>grxA::Kan</i>            | <i>grxA::Kan</i>                                           | 57        |
| <i>E. coli</i> BW25113 <i>ghrA::Kan</i>            | <i>ghrA::Kan</i>                                           | 57        |
| <i>E. coli</i> BW25113 <i>lipA::Kan</i>            | <i>lipA::Kan</i>                                           | 57        |
| <i>E. coli</i> BW25113 <i>rdgB::Kan</i>            | <i>rdgB::Kan</i>                                           | 57        |
| <i>E. coli</i> BW25113 <i>yaaA::Kan</i>            | <i>yaaA::Kan</i>                                           | 57        |
| <i>E. coli</i> BW25113 <i>recA::Kan</i>            | <i>recA::Kan</i>                                           | 57        |
| pCA24N                                             | Cloning vector, Cm-R                                       | 36        |
| pCA24N- <i>fimE</i>                                | pCA24N carrying <i>fimE</i> , Cm-R                         | 36        |
| pBAD24                                             | Cloning vector, Amp-R                                      | 80        |
| pVN15                                              | pBAD24 carrying <i>flhDC</i> operon, Amp-R                 | 80        |
