# Supplementary material for: Non-lethal exposure to H2O2 boosts bacterial survival and evolvability against oxidative stress
Source: PubMed Central journal article supplement (PMC7093028; doi:10.1371/journal.pgen.1008649), 2020-03-12
Supplement: pgen.1008649.s015.pdf [file pgen.1008649.s015.pdf]

Table S10. Primers used for amplification gene mutants from the Keio collection which PCR products were used to transfer the mutations to the *E. coli* MG1655.

| <b>Gene</b> | <b>Forward primer (5'---&gt;3')</b> | <b>Reverse primer (5'---&gt;3')</b> |
|-------------|-------------------------------------|-------------------------------------|
| <i>oxyR</i> | ACTCTCGAAACGGGCAGTG                 | GGTCAGGCGATTATGGAACAG               |
| <i>katG</i> | GATCTCAACTATCGCATCCGTG              | CACAACCAGGCCACTGAT                  |
| <i>ahpF</i> | ACCTAATTCTTCGGGTGCTG                | GGTGCTGGTTGTGCGTTAA                 |
| <i>ghrA</i> | CACCGACCACGGATTTGTTATG              | GCATCTTCCATATCCGGGCC                |
| <i>grxA</i> | CCTCTGCAAAGTGAGCCTTC                | CACCCTGTTCGATGCTCATTAT              |
| <i>lipA</i> | ACCGCTTTGGCTGCTTTC                  | CATAAAGAGTGACGTGGCGA                |
| <i>rdgB</i> | CTGGTGAAGTTTCTCGGTAAGC              | CGTACCACCGCCAATAAAGA                |
| <i>gltD</i> | GCGCGGTGAAGAGATTCTG                 | GGAAAGGTCAAACGCTCATGC               |
| <i>yaaA</i> | CCCGGTGTTTGATCCATTGC                | CAGGCAAACATCACCGCT                  |
| <i>recA</i> | GTCGTCAGGCTACTGCGTATG               | GTCGCAGTTCTTGCTCACTG                |
