# Supplementary material for: Non-lethal exposure to H2O2 boosts bacterial survival and evolvability against oxidative stress
Source: PubMed Central journal article supplement (PMC7093028; doi:10.1371/journal.pgen.1008649), 2020-03-12
Supplement: pgen.1008649.s016.pdf [file pgen.1008649.s016.pdf]

Table S11. Primers used for relative gene expression quantification by real time PCR (qPCR). RNA was extracted after a treatment of *E. coli* MG1655 with H<sub>2</sub>O<sub>2</sub> 0.1 mM during 30 minutes.

| Gene        | EcoGene ID | Forward primer (5'--->3') | Reverse primer (5'--->3')  |
|-------------|------------|---------------------------|----------------------------|
| <i>ahpC</i> | EG11384    | GCAGCACAGTACGTAGCTTCTCA   | GCCAGAGTTGCTTCACCTTCTT     |
| <i>ahpF</i> | EG11385    | CTGAACCTGATGAGCGTA        | GACCAAACCTTTCCCGT          |
| <i>dps</i>  | EG11415    | GTACATGAAATGCTGGATGG      | TGCTGTTGATAACTTGAGTG       |
| <i>fur</i>  | EG10359    | CAGCAACATCACCACGATCAC     | TGGAATCATCACTAAATTCGATAACC |
| <i>katG</i> | EG10511    | CAAATGCCCGTTCCATC         | TTAACAGGTCAACACGAAGT       |
| <i>mntH</i> | EG14157    | GTTATTCCGCCACCAAATG       | TAGCCATCATCGCCAGA          |
| <i>oxyR</i> | EG10681    | GCCAGCCGACGCTTAGC         | AACATCACGCCAGCTCATC        |
| <i>sufA</i> | EG11378    | TTGATGGCACGGAAGTC         | TGGGCTTTAGGGTTGTG          |
| <i>yaaA</i> | EG10011    | GAAACCTTCAGCGAAGACGATT    | CCATACAAGCCGAAAGCA         |
| <i>metL</i> | EG10590    | TGAGCAGGATGAAGAGTCGTTG    | CCGTGGCTGGCGAAATCAAG       |
| <i>asnA</i> | EG10091    | CTGGGCGGGAATTAAGCAACC     | CTCCTGGCTGTGTACGAAGTGG     |
